# Supplementary material for: Exploring (1$$\overline{1}$$2)-related ordered structure in oxidation-synthesized α-Fe2O3 nanowhiskers
Source: Springer Nature journal article supplement (doi:10.1007/s10853-021-05787-4), 2021-01-25
Supplement: MOESM1 [file 18799712]

**Supplementary Information for**

**Exploring (12)-related ordered structure in oxidation-synthesized α-Fe2O3 nanowhiskers**

Ming-Wei Lai, Hiroki Kurata*

Institute for Chemical Research, Kyoto University, Uji, Kyoto 6110011, Japan

*Corresponding author. E-mail: [kurata@eels.kuicr.kyoto-u.ac.jp](mailto:kurata@eels.kuicr.kyoto-u.ac.jp)

**1. Shadow-image-based growth direction determination:**

Fig. S1 shows a shadow-image-based growth direction determination result for the studied α-Fe2O3 NWs, which indicates that the NWs grow along the [110] direction.

**Fig. S1.** (a) Image of the inspected NW. (b) Shadow-image-based electron diffraction pattern. Note that because of the saturation limitation of the CCD camera, only strong diffraction spots exhibit sensible image intensities.

**2. Intensity ratio of the (2) and (20) spots:**

Zoomed images of areas including the (2) and (20) spots in Fig. 4c to 4e are shown in Fig. S2a to S2c, wherein intensity profile lines across the (2) and (20) spots (with an integration width of 0.15 nm-1) can be seen. The intensity profiles corresponding to the intensity profile lines are given in Fig. S2d to S2f. For each of the intensity profiles, intensity values of the (2) and (20) peaks were determined by subtracting the local background, defined to be the intensity value at the saddle between the two peaks, from the peaks’ summit intensity values. By then dividing the acquired intensity values, we got the intensity ratio of the (2) and (20) spots.

**Fig. S2.** (a)–(c) Zoomed images of areas including the (2) and (20) spots in Fig. 4c–4e. The teal boxes represent the intensity profile lines. (d)–(f) Intensity profiles respectively correspond to the intensity profile lines in (a)–(c).

**3. Supercell adopted for the HR-TEM image simulation:**

To simulate an HR-TEM image of α-Fe2O3 along the [11] zone axis, one needs to create a supercell which c-axis is parallel to the [11] direction of the original α-Fe2O3 unit cell. Thus, the condition of normal incidence can be met. Fig. S3a displays the supercell built for our HR-TEM image simulation.

It is worth noting that, for the [11] zone axis, it is incapable of building a reasonable-sized supercell which does not generate a misalignment issue when multiplying horizontally (Fig. S3b). In our HR-TEM image simulation (based on the multislice calculation), this was dealt by setting the slice thickness equal to the atomic repeat distance along the [11] direction of the α-Fe2O3 lattice (16.28 Å). Since the oversized slice thickness mainly introduced tiny contrast inaccuracy to the simulation result, it is not a crucial concern for the research work herein.

**Fig. S3.** (a) Comparison between the original α-Fe2O3 unit cell and the built supercell. (b) Illustration of the misalignment issue for the supercell.

**4. Evaluation of the Fe–O bonding covalency in α-Fe2O3:**

The evaluation of the Fe–O bonding covalency in α-Fe2O3 is composed of two major steps. At first, a signal-purified experimental Fe L3-edge EELS spectrum of the α-Fe2O3 reference sample (the plural-scattering contribution was removed by the Fourier-ratio deconvolution; the contribution corresponding to transitions to the continuum was modeled with an arctangent function and was removed as well) was fitted by using the charge transfer multiplet calculation to obtain required parameters. Then, on the basis of the obtained parameters, the proportions of Fe 3d character in the ground-state Fe–O bonding orbitals of α-Fe2O3 were extracted using the strong-field-based projection methodology [39], thereby acquiring the Fe–O bonding covalency in α-Fe2O3. The details of these two major steps are described below.

- Fitting the experimental spectrum using the charge transfer multiplet simulation:

The CTM4XAS program[38] was adopted to simulate the Fe L3-edge spectrum. Although the (FeO6)9- clusters in α-Fe2O3 are trigonally slightly distorted [S1], Oh ligand symmetry was used to approximate the scenario of oxygen ligands surrounding each iron cation, for the program we used to extract the Fe 3d character proportions in the Fe-O bonding orbitals currently does not support the charge transfer multiplet calculation for D3d ligand symmetry. Since the cluster distortion is tiny, this approximation is reasonable. Regarding the spectrum calculation, we set the Slater integral reduction and charge transfer parameters according to de Groot et al. and Miedema et al. [S2,S3]; the 3d spin-orbit coupling was completely quenched. The optima value of the ionic crystal field was found to be 0.88 eV. The simulated spectrum, together with the experimental spectrum, is shown in Fig. S4a, wherein the two spectra are nicely overlapped at the main peak. As for the small deviation at the split peak, we believe that it stems from two major reasons. First, because Oh ligand symmetry was adopted, the D3d-associated t2g states splitting for α-Fe2O3 [S1] was ignored in our simulation (in terms of crystal-field projection, the split peak is predominantly weighted by the transitions to the t2g electronic states). Second, owing to the structural isotropy of Oh ligand symmetry, the spectroscopic orientation dependency of α-Fe2O3 (in accordance with D3d ligand symmetry) was also overlooked. Despite the presence of a small shape deviation at the split peak, the agreements in the main peak shape, overall spectrum area, and energy interval between the main peak and the split peak indicate the adopted charge transfer parameters and ionic-crystal-field splitting value are adequate enough to evaluate the Fe–O bonding covalency in α-Fe2O3.

- Evaluating the Fe–O bonding covalency:

With the parameters verified through the spectrum fitting, the proportions of Fe 3d character in the ground-state bonding orbitals of α-Fe2O3 were extracted using the CTM4DOC program [39], for which we acquired that the Fe 3d character proportions in the eg and t2g molecular orbitals were respectively 62.6% and 88.4% (Fig. S4b), i.e., the σ-bond bonding covalency and π-bond bonding covalency in α-Fe2O3 are 37.4% and 11.6%, respectively. Thus, on the basis of the approximation of Oh ligand symmetry, the weight-averaged Fe–O bonding covalency in α-Fe2O3 is 21.9% (0.4×37.4%＋0.6×11.6%).

**Fig. S4.** (a) Comparison between the simulated and experimental Fe L3-edge spectra. (b) Proportions of Fe 3d character in the ground-state bonding orbitals of α-Fe2O3.

**5. Details of simulating the O K-edge near-edge EELS spectra:**

Version 9.6 of the FEFF9 code was used to perform the spectral simulations. The muffin-tin-sphere overlap degree was set to 15%. The SCF loop parameters were set to 6 (rfms), 0 (lfms), 100 (nscmt), 0.2 (ca), and 1 (nmix). The Hedin-Lundqvist self-energy was chosen to approximate the exchange-correlation potential. To compensate the intrinsic charge counting error of the FEFF9 code, a 2.3-eV Fermi level shift (in the negative direction) was introduced. The final state rule was adopted to treat the core-hole. The incident electron beam was arbitrarily defined to be parallel to the [001] direction. The Debye-Waller factor was not taken into account, for the simulation work was primarily concerned with the spectrum-onset region.

According to a FMS convergence check (Fig. S5), we found that having the cluster’s outer boundary beyond the 30th O shell could result in the simulated spectrum feature about convergent. For a higher reliability, the 40th O shell was chosen to be the cluster’s outer boundary for the spectral simulations.

**Fig. S5.** FMS convergence check－spectrum feature vs. cluster’s outer boundary.

**Supplementary References:**

S1. Kronawitter CX, Zegkinoglou I, Shen S, Guo J, Himpsel FJ, Mao SS, Vayssieres L (2013) On the orbital anisotropy in hematite nanorod-based photoanodes. Phys Chem Chem Phys 15:13483-13488

S2. de Groot FMF, Glatzel P, Bergmann U, van Aken PA, Barrea RA, Klemme S, Hävecker M, Knop-Gericke A, Heijboer WM, Weckhuysen BM (2005) 1s2p resonant inelastic X-ray scattering of iron oxides. J Phys Chem B 109:20751-20762

S3. Miedema PS, Borgatti F, Offi F, Panaccione G, de Groot FMF (2015) Iron 1s X-ray photoemission of Fe2O3. J Electron Spectrosc Relat Phenom 203:8-13
